# Supplementary material
Source: Springer Nature journal article supplement (https://www.springermedizin.de/resource/supplementary/12885_2013_4137_MOESM5_ESM.pdf/9465540)

**A** **Cells**

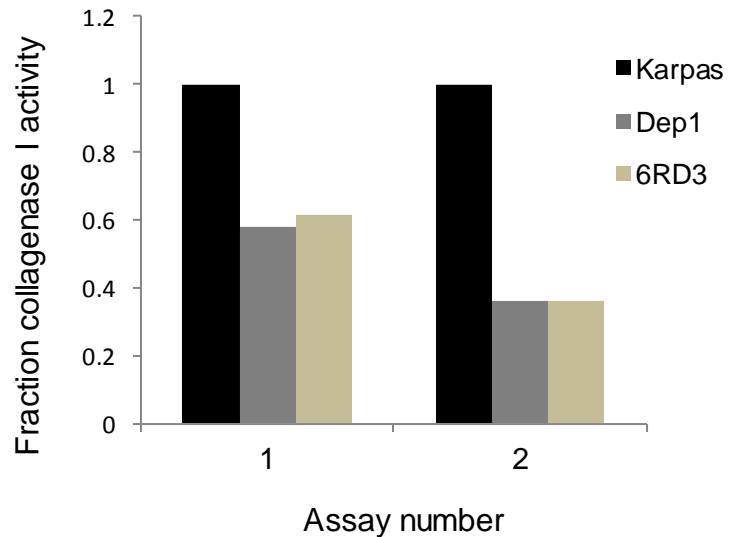

**B** **Vesicles**

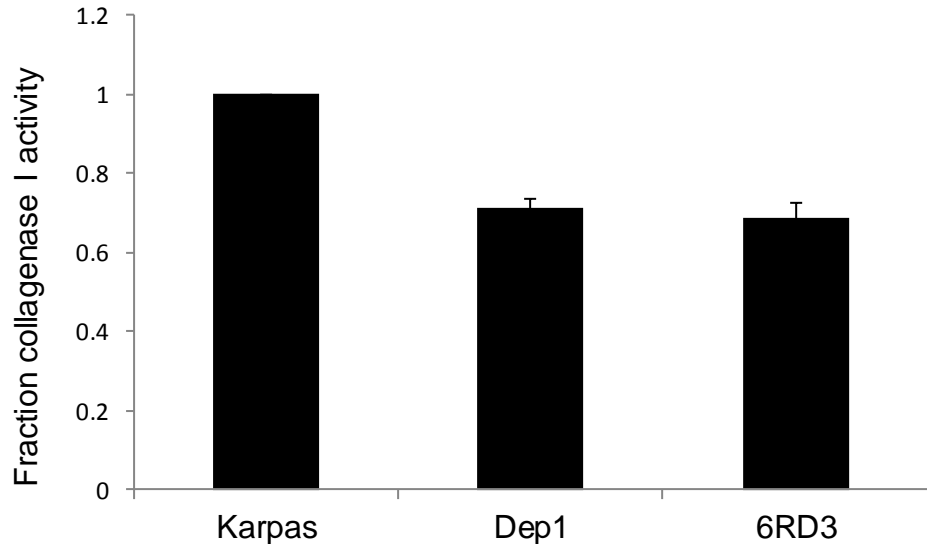

Supplement: MOESM5 [file 9465540]
